# Supplementary material for: A study on the aerosol optical properties over East Asia using a combination of CMAQ-simulated aerosol optical properties and remote-sensing data via a data assimilation technique
Source: Copernicus journal article supplement (doi:10.5194/acp-11-12275-2011), 2011-12-08
Supplement: Supplementary file 1 [file acp-11-12275-2011-supplement.pdf]

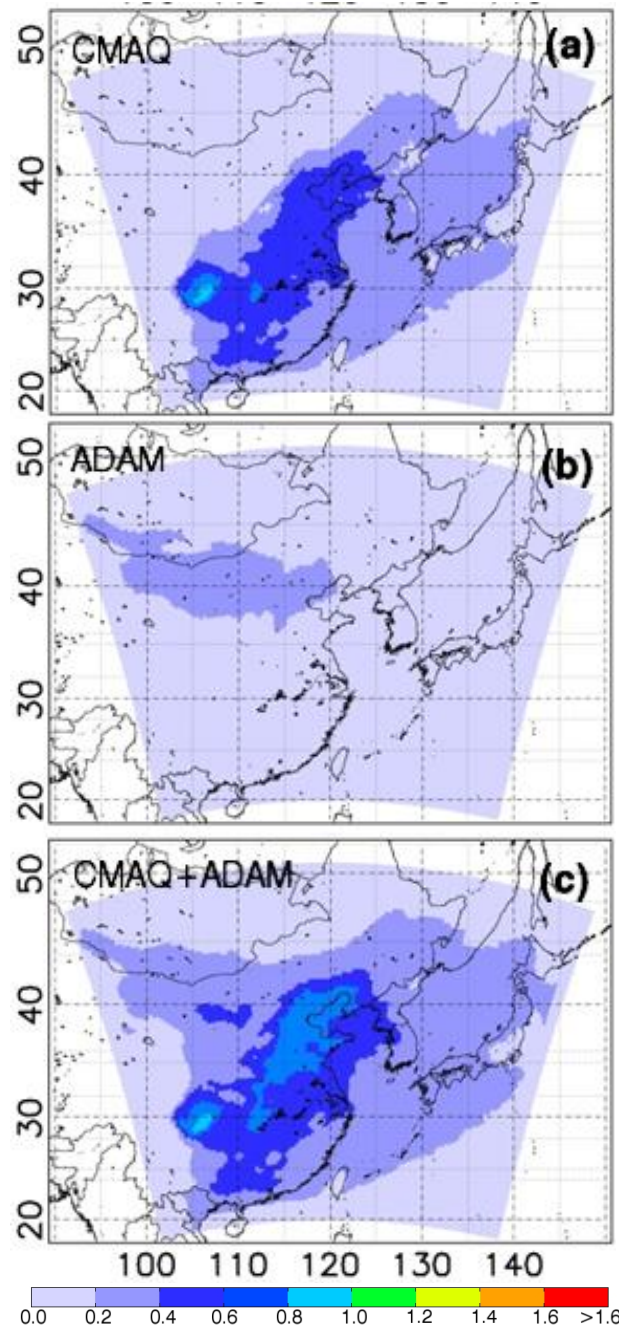

**Figure S1.** Spatial distributions of the CMAQ-simulated AODs (panel a), ADAM-simulated dust AODs (panel b) and combined AODs from the CAMQ and ADAM model simulations (panel c) over East Asia in spring, 2006.
